# Supplementary material for: meso-Aryl substituted free-base tripyrrins: preparation and electrochemically induced protonation/deprotonation reactions. Single crystal X-ray analysis of (2,6-diFPh)2TriPyH
Source: Royal Society of Chemistry journal article supplement (doi:10.1039/c5ra19603e), 2015-01-01
Supplement: c5ra19603e1.pdf [file c5ra19603e1.pdf]

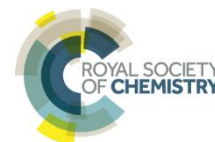

Journal Name

ARTICLE

## Supporting Information

**Meso-aryl substituted free-base tripyrins: preparation and electrochemically induced protonation/deprotonation reactions. Single crystal X-ray analysis of (2,6-diFPh)<sub>2</sub>TriPyH**

Ru Feng,<sup>a</sup> Zhongping Ou,<sup>a\*</sup> Zhaoli Xue,<sup>a</sup> Yuanyuan Fang,<sup>a</sup> Yang Song<sup>b</sup> and Karl M. Kadish<sup>b\*</sup>

**Table S1.** Selected crystallographic data of (2,6-diFPh)<sub>2</sub>TriPyH **1**.

|                                                                                                        |                                                               |
|--------------------------------------------------------------------------------------------------------|---------------------------------------------------------------|
| chemical formula                                                                                       | C <sub>34</sub> H <sub>21</sub> F <sub>4</sub> N <sub>5</sub> |
| formula weight                                                                                         | 575.56                                                        |
| <i>T</i> , K                                                                                           | 153(2)                                                        |
| cryst. system                                                                                          | monoclinic                                                    |
| space group                                                                                            | <i>P</i> 2(1)/ <i>n</i>                                       |
| <i>a</i> , Å                                                                                           | 11.144(2)                                                     |
| <i>b</i> , Å                                                                                           | 13.300(3)                                                     |
| <i>c</i> , Å                                                                                           | 19.616(4)                                                     |
| $\alpha$ , deg                                                                                         | 90.00                                                         |
| $\beta$ , deg                                                                                          | 106.05(3)                                                     |
| $\gamma$ , deg                                                                                         | 90.00                                                         |
| <i>V</i> , Å <sup>3</sup>                                                                              | 2794.1(11)                                                    |
| <i>Z</i>                                                                                               | 4                                                             |
| $\lambda$ , Å                                                                                          | 0.71073                                                       |
| $d_{\text{calcd}}$ , g.cm <sup>-3</sup>                                                                | 1.368                                                         |
| $\mu$ (mm <sup>-1</sup> )                                                                              | 0.101                                                         |
| <i>F</i> (000)                                                                                         | 1184                                                          |
| reflections collected                                                                                  | 12880                                                         |
| unique reflections                                                                                     | 5520                                                          |
| <i>GOF</i> ( <i>F</i> <sup>2</sup> )                                                                   | 1.021                                                         |
| $R_1^a, wR_2^b$ ( <i>I</i> > 2 $\sigma$ ( <i>I</i> ))                                                  | 0.0448, 0.0949                                                |
| $R_1^a, wR_2^b$ (all data)                                                                             | 0.0544, 0.1013                                                |
| $R_1^a = \sum   F_o  -  F_c   / \sum F_o$ . $wR_2^b = [\sum w(F_o^2 - F_c^2)^2 / \sum w(F_o^2)]^{1/2}$ |                                                               |

**Table S2.** Selected bond lengths (Å) and angles (°) of (2,6-diFPh)<sub>2</sub>TriPyH **1**.

| bond lengths (Å) |          | angles (°)  |          |
|------------------|----------|-------------|----------|
| N1-H1B           | 0.91(4)  | C4-N1-C1    | 107.4(8) |
| N3-H3A           | 0.90(2)  | C5-N2-C8    | 105.2(1) |
| N5-H5A           | 0.86(2)  | C10-N3-C13  | 110.2(1) |
| C4-C5            | 1.433(3) | C15-N4-C18  | 105.3(1) |
| C8-C9            | 1.374(3) | C19-N5-C22  | 109.6(2) |
| C9-C10           | 1.431(2) | C3-C4-C5    | 115.9(5) |
| C9-C23           | 1.490(3) | C4-C5-C6    | 124.6(2) |
| C13-C14          | 1.430(2) | C7-C8-C9    | 125.8(2) |
| C14-C15          | 1.374(3) | C8-C9-C23   | 118.7(2) |
| C14-C29          | 1.488(3) | C10-C9-C23  | 116.3(1) |
| C18-C19          | 1.426(3) | C9-C10-C11  | 129.6(2) |
| F1-C24           | 1.357(2) | C12-C13-C14 | 130.1(2) |
| F2-C28           | 1.354(3) | C13-C14-C29 | 117.6(1) |
| F3-C30           | 1.364(2) | C14-C15-C16 | 125.3(2) |
| F4-C34           | 1.359(2) | C17-C18-C19 | 124.4(2) |
| --               | --       | C18-C19-C10 | 131.7(2) |

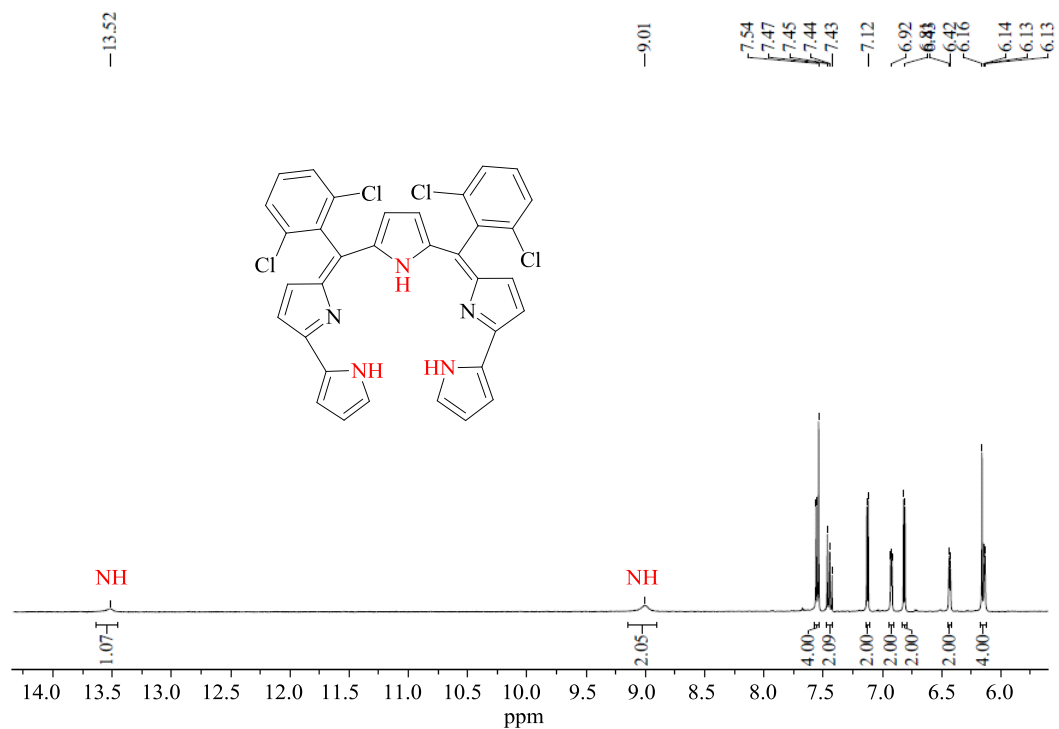

**Fig S1.** <sup>1</sup>H NMR spectra of (2,6-diClPh)<sub>2</sub>TriPyH **2** in CD<sub>2</sub>Cl<sub>2</sub> at 298 K.

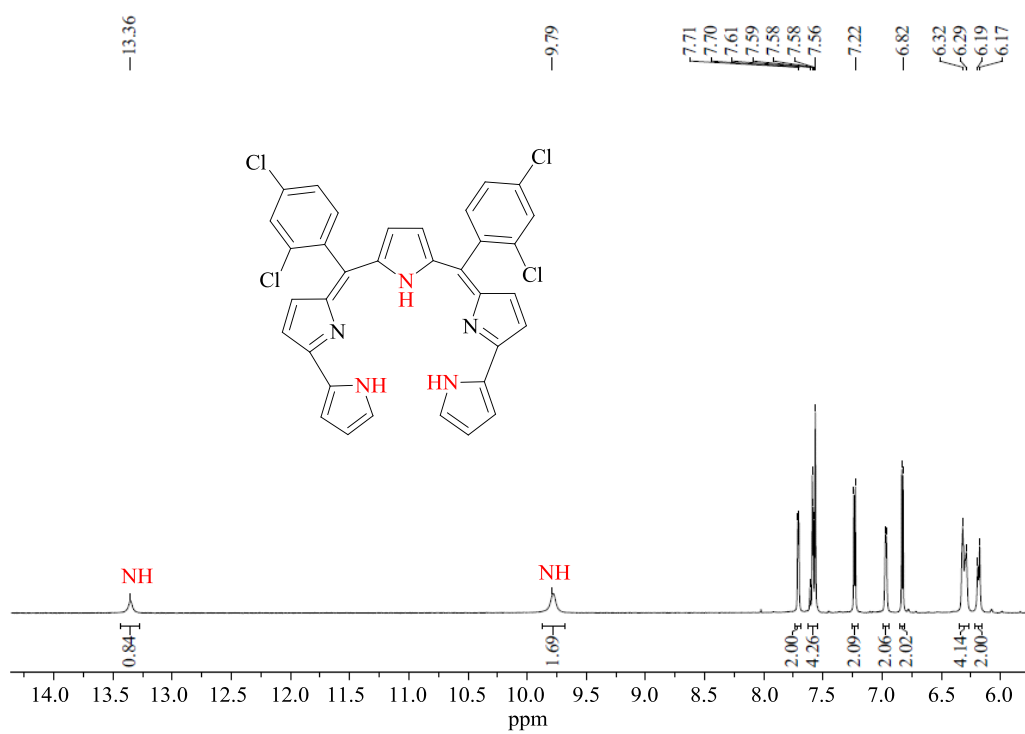

**Fig S2.** <sup>1</sup>H NMR spectra of (2,4-dichlorophenyl)<sub>2</sub> TriPyH **3** in CD<sub>3</sub>COCD<sub>3</sub> at 298 K.

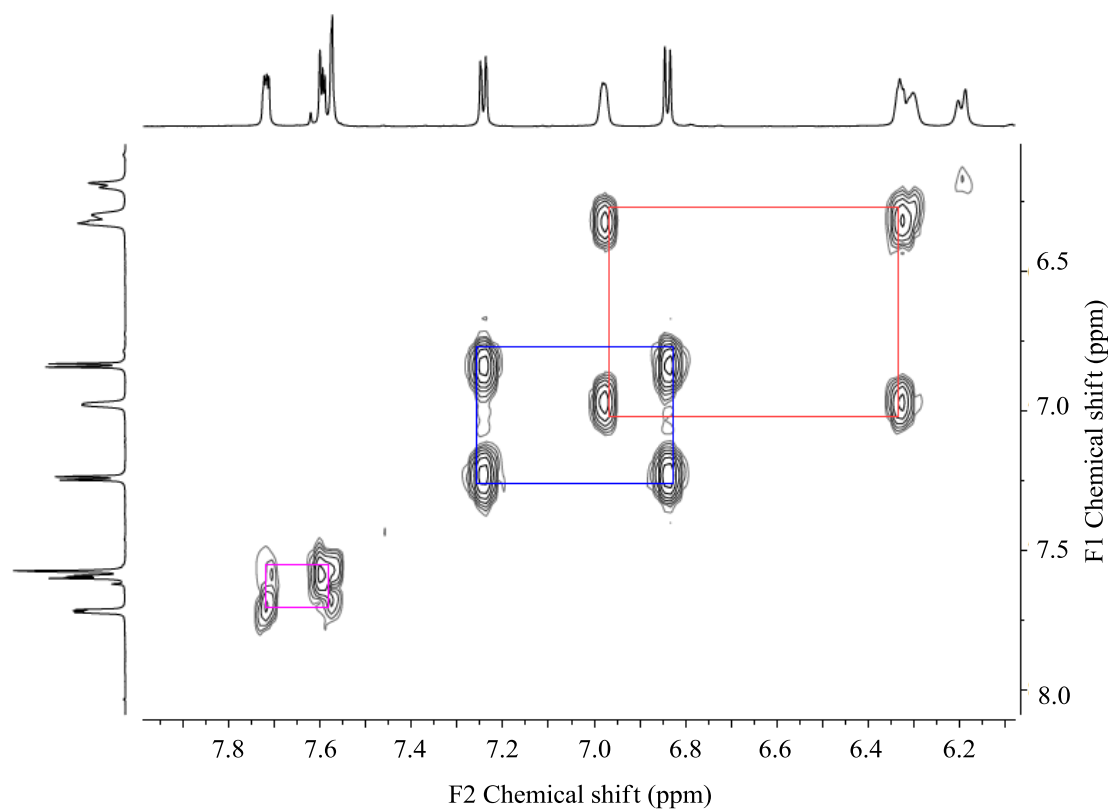

**Figure S3.** H-H COSY NMR spectrum of (2,4-diClPh)<sub>2</sub>TriPyH **3** in CD<sub>3</sub>COCD<sub>3</sub>.

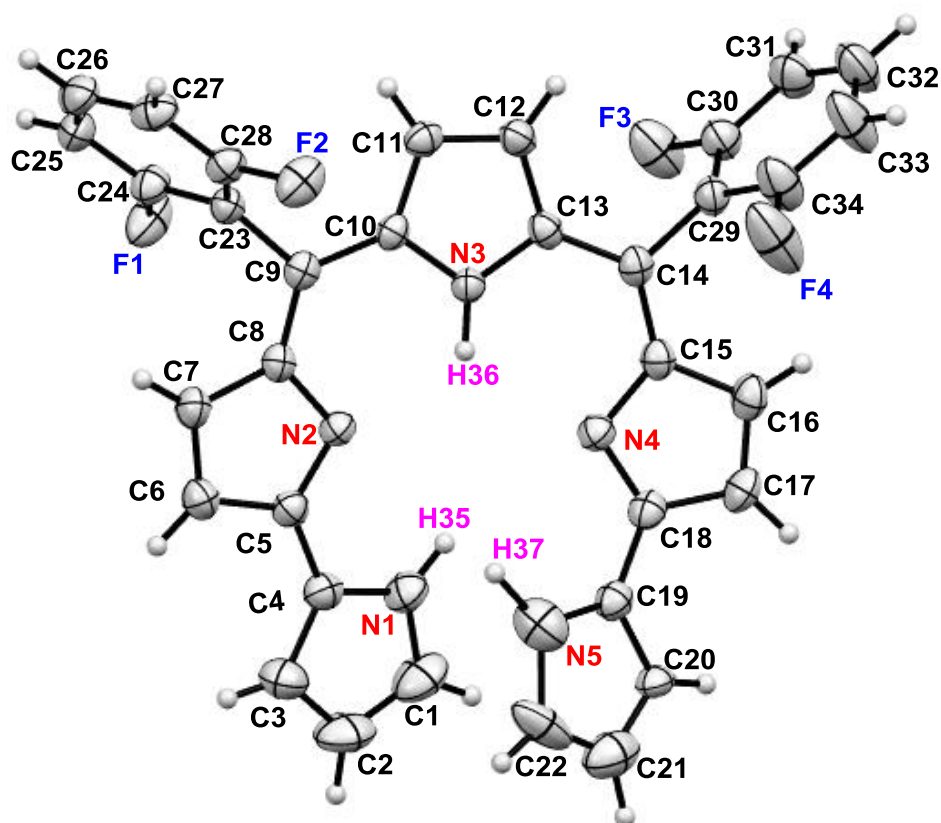

**Figure S4.** The crystal structures of (2,6-diFPh)<sub>2</sub>TriPyH **1** with thermal ellipsoids set at 50 % probability.

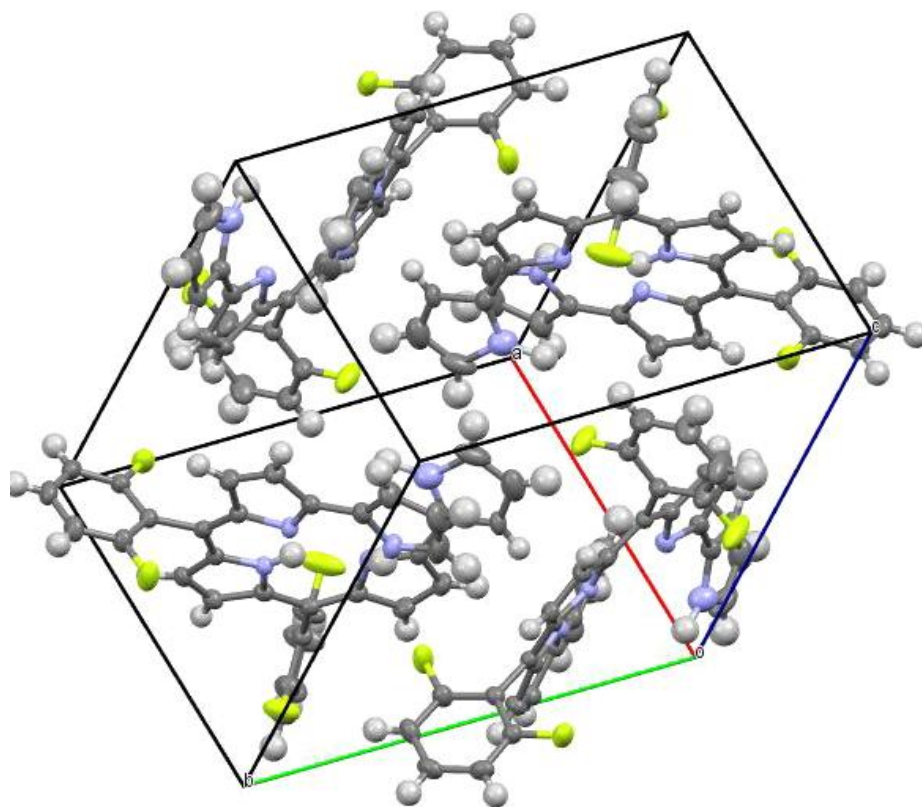

**Figure S5.** Packing diagram of  $(2,6\text{-diFPh})_2\text{TriPyH}$  **1**. The solvent molecules and protons are omitted for clarity.



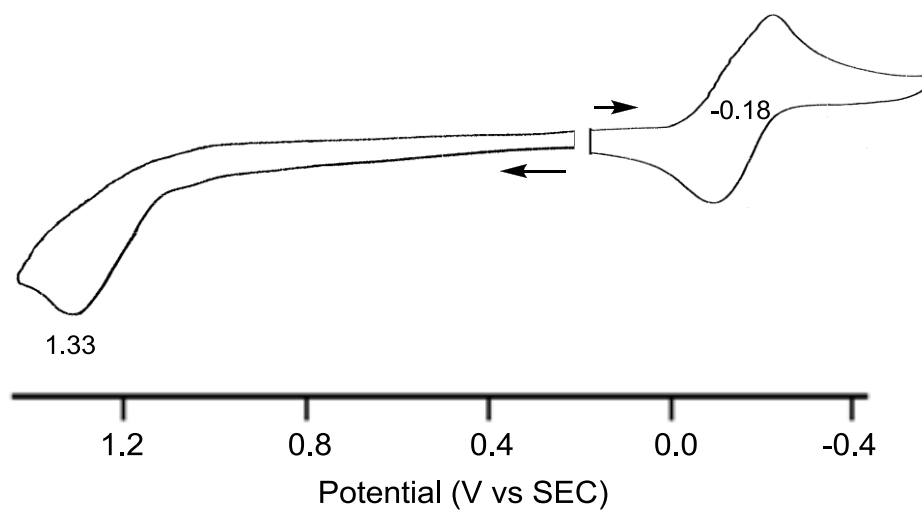

**Figure S6.** Cyclic voltammograms of **3** obtained in  $\text{CH}_2\text{Cl}_2$  containing 0.1 M TBAP after addition of 2.0 eq TFA. Scan rate = 0.10 V/s.
